# Supplementary material
Source: publisher figshare collection journal article supplement (https://aacr.figshare.com/articles/dataset/_/22490315)
Supplement: Supplementary file 1 [file 39941948]

**Fig. S7**

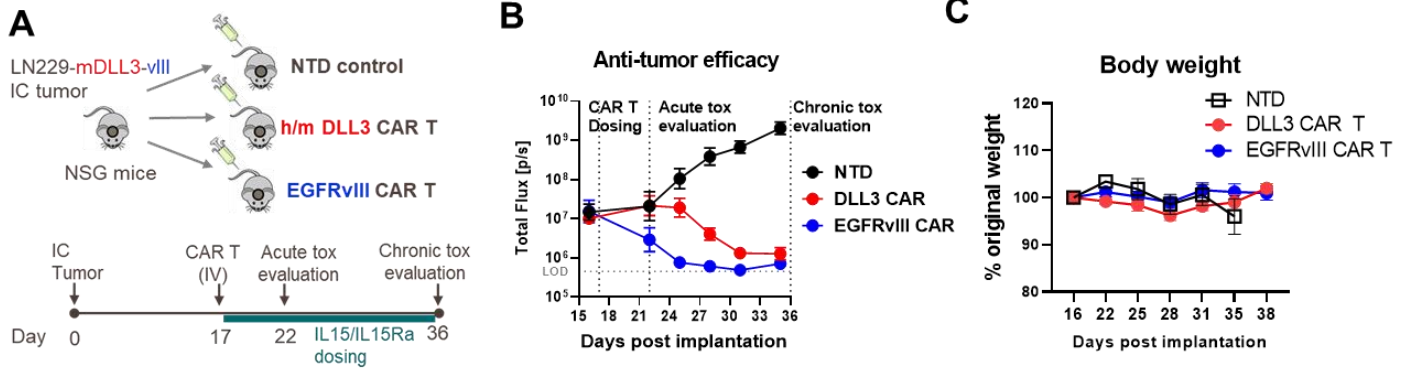

**D** **Histopathology Analysis**

| Group          | Acute tox evaluation ( day 22) |                                               |             | Chronic tox evaluation ( day 36) |             |                                        |
|----------------|--------------------------------|-----------------------------------------------|-------------|----------------------------------|-------------|----------------------------------------|
|                | Animal                         | Brain                                         | Pituitary   | Animal                           | Brain       | Pituitary                              |
| NTD            | #1                             | Tumor                                         | No findings | #3                               | No findings | No findings                            |
|                | #2                             | No findings                                   | No findings | #4                               | Tumor       | No findings                            |
|                | #5                             | No findings                                   | No findings | #7                               | Tumor       | No findings                            |
|                | #6                             | No findings                                   | No findings | #8                               | Tumor       | No findings                            |
|                | #10                            | No findings                                   | No findings | #9                               | Tumor       | No findings                            |
| DLL3 CAR T     | #12                            | Tumor                                         | No findings | #11                              | Tumor       | Infiltrate, mononuclear cell (Grade 2) |
|                | #14                            | Tumor                                         | No findings | #13                              | Tumor       | Infiltrate, mononuclear cell (Grade 2) |
|                | #15                            | Tumor                                         | No findings | #16                              | Tumor       | Infiltrate, mononuclear cell (Grade 1) |
|                | #19                            | No findings                                   | No findings | #17                              | No findings | Infiltrate, mononuclear cell (Grade 2) |
|                | #20                            | Tumor                                         | No findings | #18                              | No findings | Infiltrate, mononuclear cell (Grade 2) |
| EGFRvIII CAR T | #22                            | No findings                                   | No findings | #21                              | No findings | No findings                            |
|                | #25                            | Infiltrate/gliosis, cortical, focal (Grade 2) | No findings | #27                              | No findings | No findings                            |
|                | #26                            | Infiltrate, meninges, focal (Grade 1)         | No findings | #29                              | No findings | No findings                            |
|                | #31                            | Infiltrate/gliosis, cortical, focal (Grade 2) | No findings | #30                              | No findings | No findings                            |
|                | #32                            | Gliosis/infiltrate, cortical, focal (Grade 1) | NA          | #35                              | No findings | No findings                            |

\*\*Severity: Grade 1=Minimal; Grade 2=Mild; Grade 3=Moderate

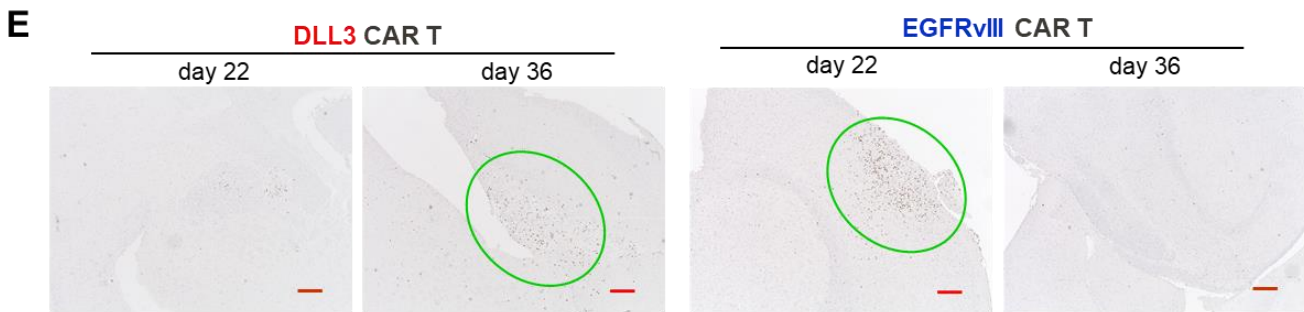

**F** **Staining of pituitary hormones (day 36)**

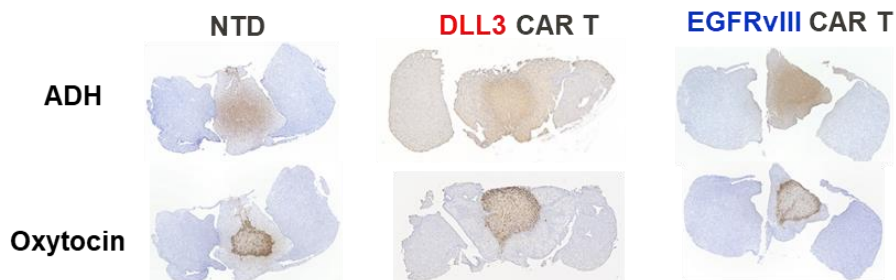

**Fig. S7. DLL3 CAR T cells demonstrate activity in intracranial tumor model without causing toxicity.** (A) & (B) Design and anti-tumor efficacy of in vivo study with intracranial tumor expressing DLL3 and EGFRvIII to understand tox liabilities. LOD, limit of detection. Plots represent only the animals remaining on D36 (n=5). Error bars represent SEM. (C) DLL3 CAR T cells or EGFRvIII CAR T cells did not induce obvious changes of body weight throughout the study. Plots represent only the animals remaining on D36 (n=5). Error bars represent SEM. (D) Histopathology analysis showed mild infiltration/inflammation in pituitary of DLL3 CAR-treated animals. No findings for brain samples. (E) Infiltration of DLL3 CAR T and EGFRvIII CAR T cells in the area of glioma in the brain. Green circles show the area of infiltration. (F) Hormone secreting cells were not ablated despite T cell infiltration.
